# Supplementary material
Source: PubMed Central journal article supplement (PMC8851534)
Supplement: sj-pdf-1-ebm-10.1177_15353702211055099.pdf [file sj-pdf-1-ebm-10.1177_15353702211055099.pdf]

## *Supplementary Material*

### **1. Supplementary Figures**

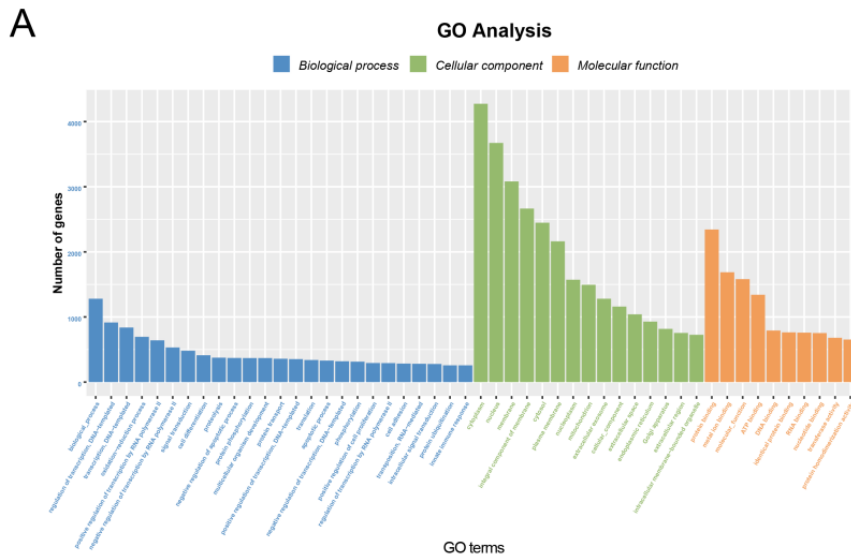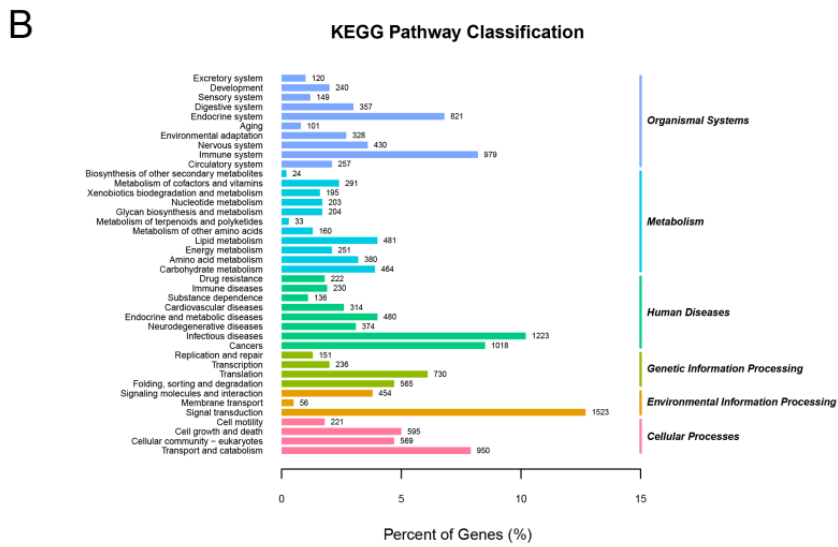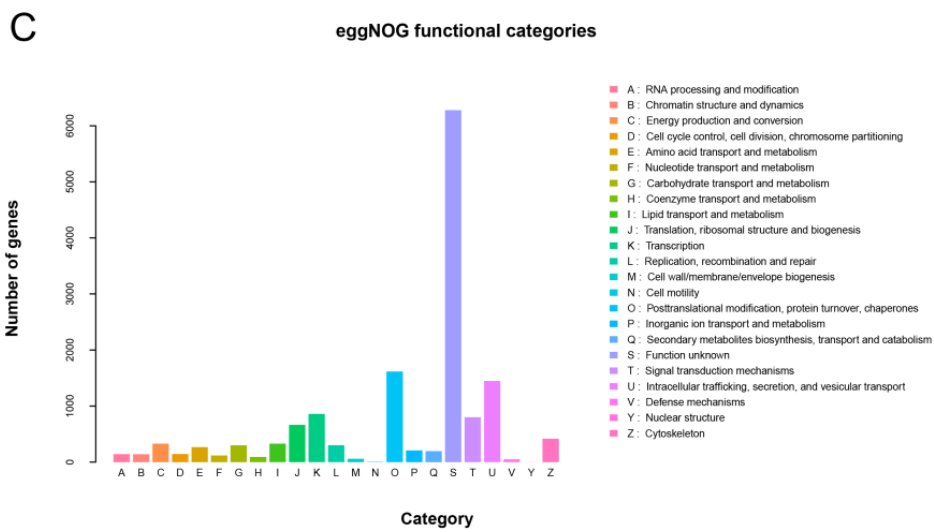

**Supplementary Figure 1.** Annotation of the unigenes. (A) Gene ontology (GO) term annotation. (B) KEGG pathway annotation. (C) eggNOG annotation.

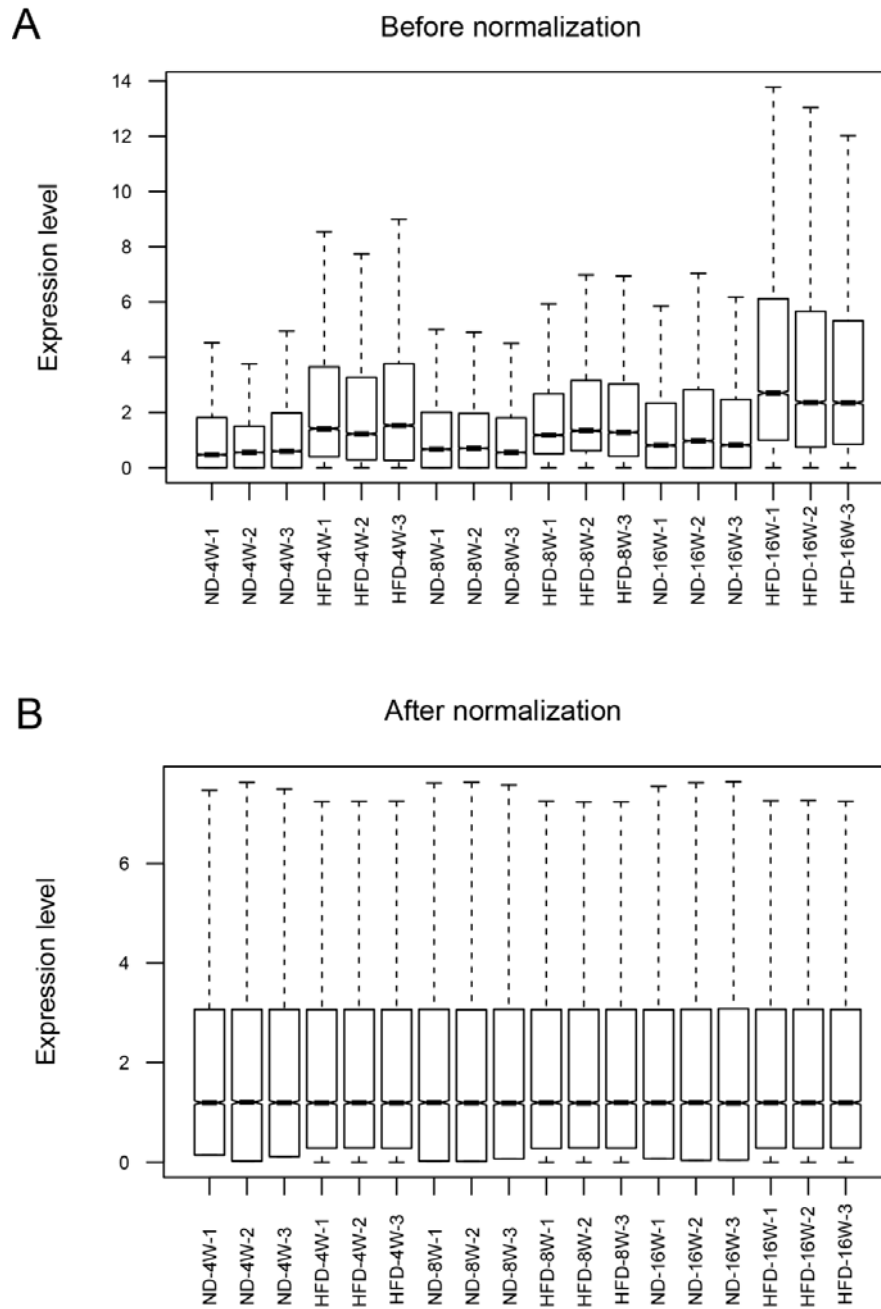

**Supplementary Figure 2.** Data normalization. (A) Data distribution before normalization; (B) Data distribution after normalization. ND, normal diet; HFD, high-fat diet; 4W, 4-week; 8W, 8-week; 16W, 16-week.

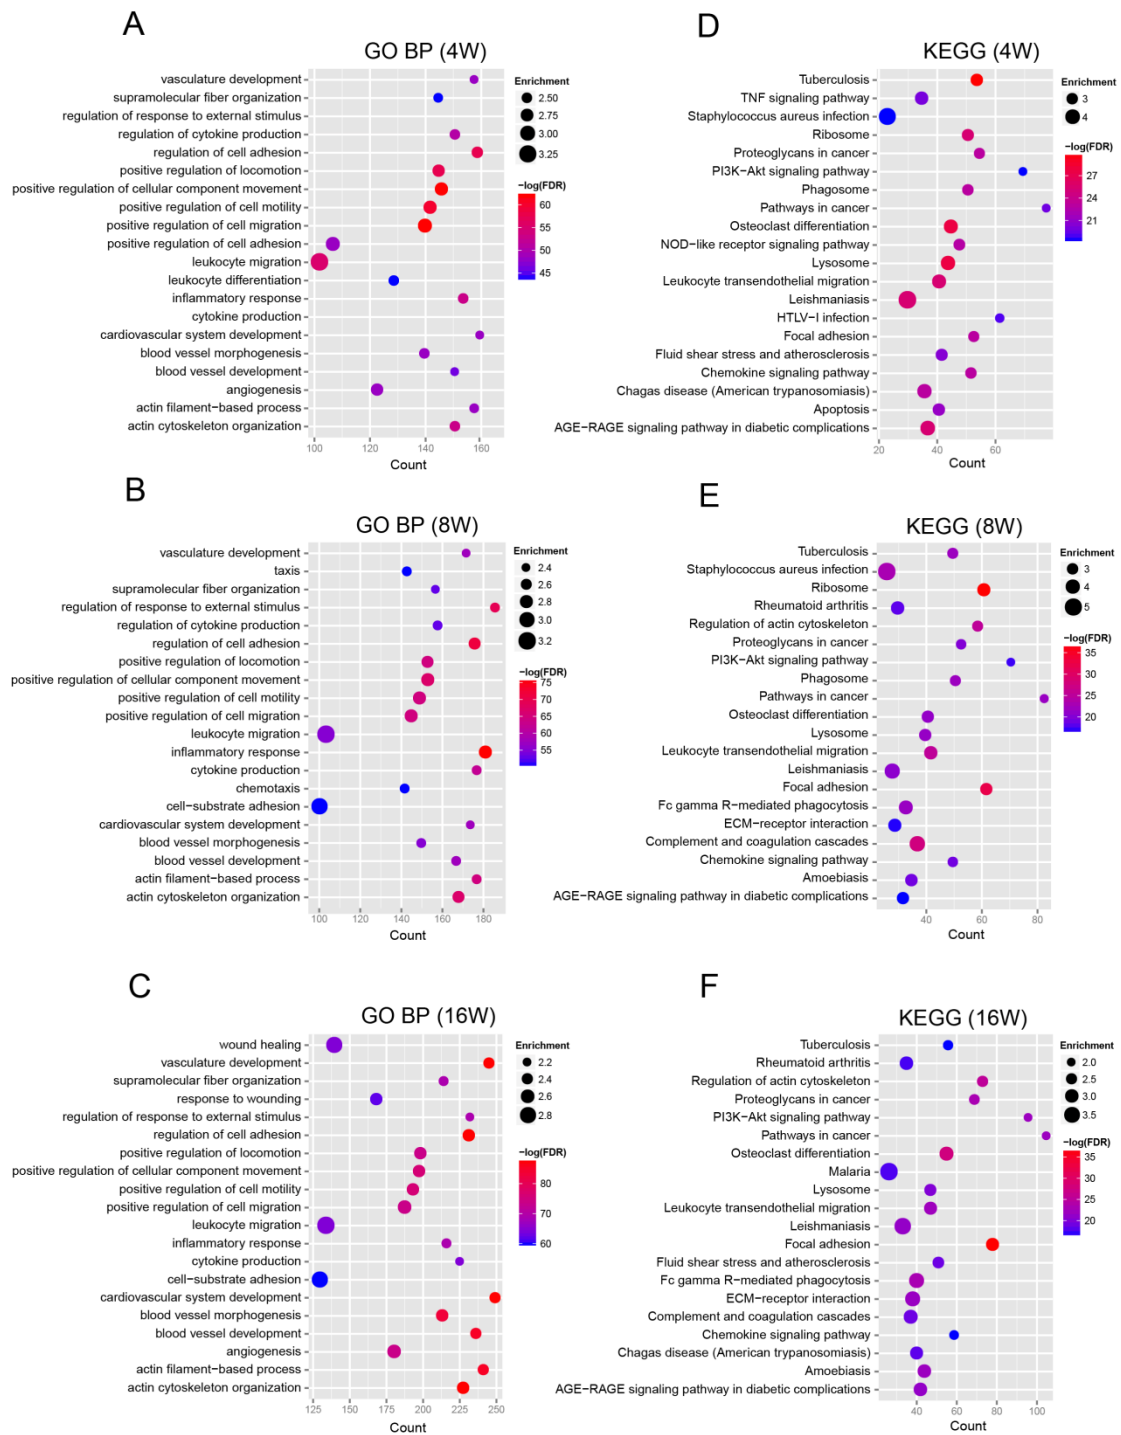

**Supplementary Figure 3.** GO BP and KEGG analyses of DEGs from the pairwise comparisons at HFD groups vs. ND groups of 4W, 8W and 16W.(A,B,C) GO BP terms enrichment of the DEGs from 4W, 8W and 16W time points. (D,E,F).KEGG pathway enrichment of the EGs from 4W, 8W and 16W time points.

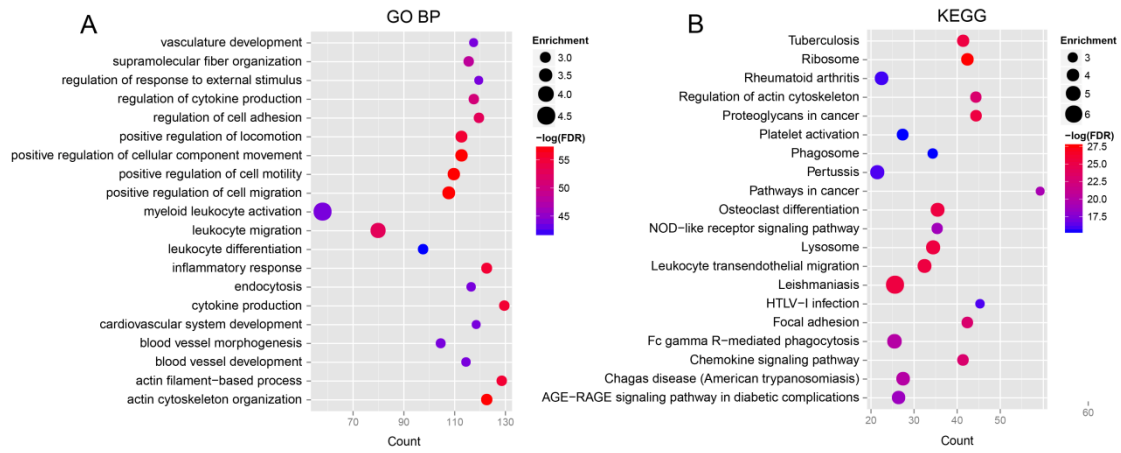

**Supplementary Figure 4.** GO BP and KEGG analyses of Overlapping DEGs among 4W, 8W and 16W groups. (A,B,C). GO BP terms enrichment. (D,E,F). KEGG pathway enrichment.

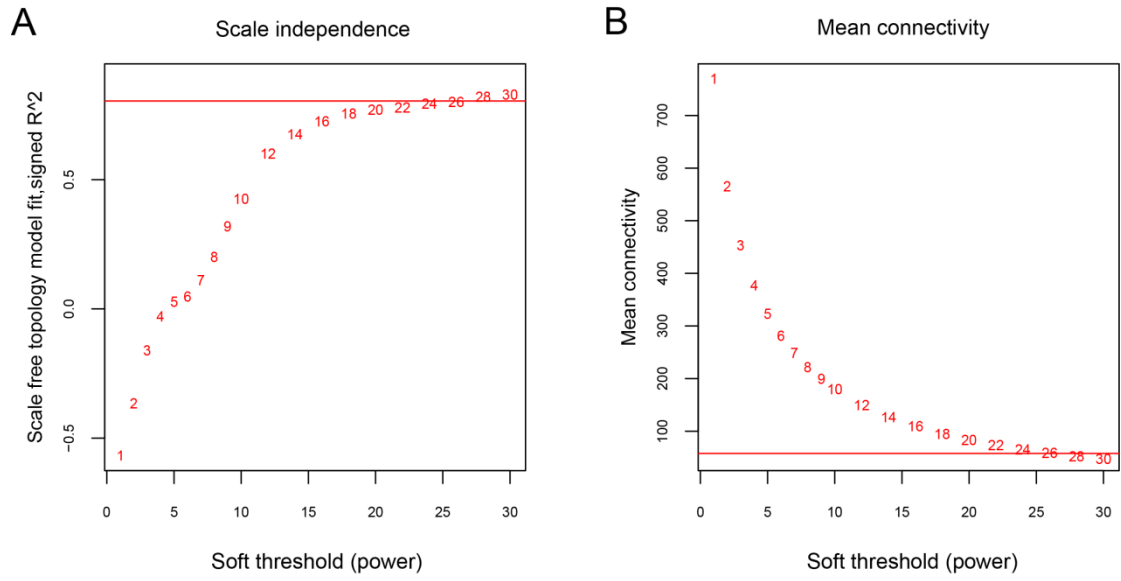

**Supplementary Figure 5.** The soft-thresholding power calculation of WGCNA analysis. (A). The panel shows scale independence. (B). The panel represents mean connectivity.

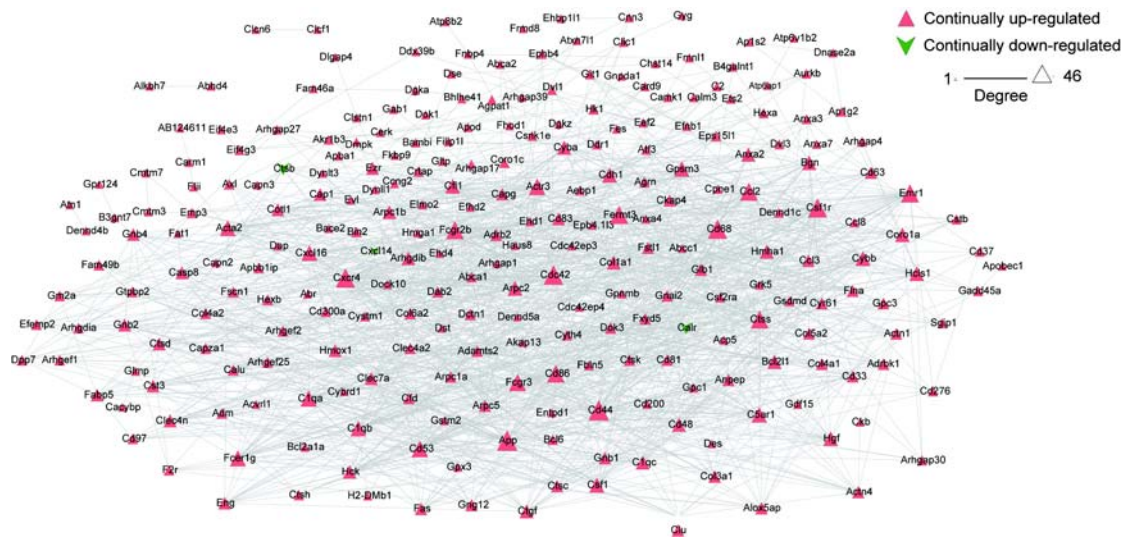

**Supplementary Figure 6.** PPI network obtained from the 800 overlapping DEGs showed in Figure 5A. A triangle or an inverted triangle represents the DEG that was continually up-regulated or down-regulated, respectively. The size of the node represents the Degree value.

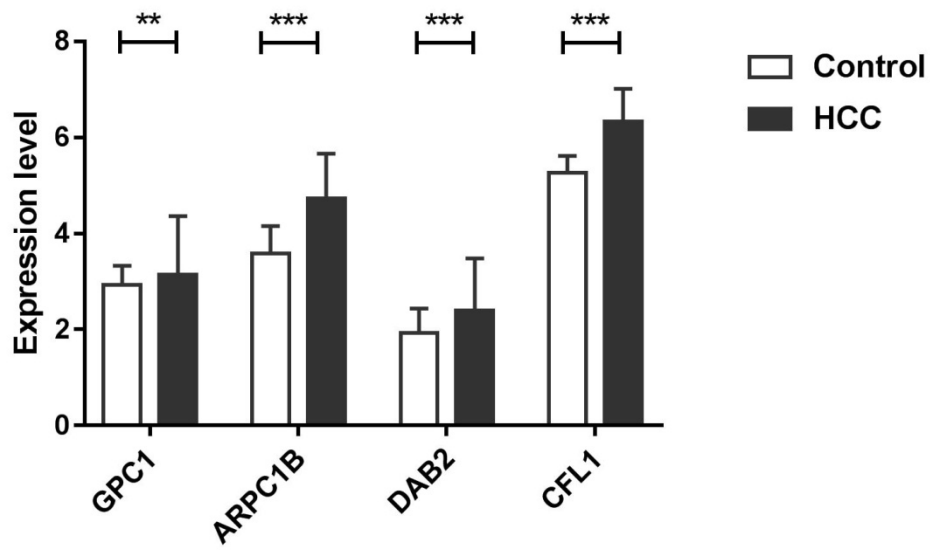

**Supplementary Figure 7.** Expression levels of GPC1,ARPC1B, DAB2 and CFL1 in healthy controls and HCC patients. The expression levels were investigated in 50 normal tissues and 370 HCC tissues from TGCA. Statistical differences were examined by two tailed Student's t-test. \*\*P < 0.01, \*\*\*P < 0.001.



## 2. Supplementary Tables

**Supplemental Table 1**

| <b>Primer</b>        | <b>Sequence</b>          |
|----------------------|--------------------------|
| Ger-Cd44-F           | GGCAATGGAACGATGGAGGACAG  |
| Ger-Cd44-R           | AGTGGTCTGGAGTCTCTGATGGC  |
| Ger-App-F            | TGACGAGGATGCGGAGGATGG    |
| Ger-App-R            | TGGTGGTGGTGGTGGTAGTGG    |
| Ger-Cdc42-F          | GGCTGTCAAGTATGTGGAGTGCTC |
| Ger-Cdc42-R          | CTGCGGCTCTTCTTGGGTTCTG   |
| Ger-Cd68-F           | GCTGCCACTCTGCTGCCATC     |
| Ger-Cd68-R           | ACTGGTCGTGCTGTTCCCTTGTTG |
| Ger-Cxcr4-F          | GTCCATGCCACCAACAGTCAGAG  |
| Ger-Cxcr4-R          | AAGTCAGGGATGGTCAGGAGAAGG |
| Ger-Csf1r-F          | TGTAGGACGAATCAAGCAGCAACC |
| Ger-Csf1r-R          | AGAGGAGCAGCAGCAGCAGAG    |
| Ger-Adgre1-F         | CTGTGGCTGTCTTCCTGGCTTC   |
| Ger-Adgre1-R         | CCCTGATTGGCACTGTGTATCTG  |
| Ger-Fermt3-F         | CCAGTCTGTCACCCTCCGAGTC   |
| Ger-Fermt3-R         | CCAGTCCTGCTTGCGATTGATCTC |
| Ger-Tgf- $\beta$ 1-F | GCAACAATTCTGGCGTTACCTTG  |
| Ger-Tgf- $\beta$ 1-R | CGAAAGCCCTGTATGCCGTCTC   |
| Ger-Col1a2-F         | CATTGGTCCTGCTGGTGCTGTC   |
| Ger-Col1a2-R         | TCGCCACGGTTTCCATGTTTCC   |
| Ger-Pdgfb-F          | ACCTCCACCAGCAGCAGTCAG    |
| Ger-Pdgfb-R          | GGTCAAGGGAAGAAGCAGCATGG  |
| Ger-Ctgf-F           | ACCTGTGCCTGCCATTACAACCTG |
| Ger-Ctgf-R           | TCCCTTACGCCCTGGCTCTTATG  |
| Ger-Gapdh-F          | ACGGCAAGTTCAACGGCACAG    |
| Ger-Gapdh-R          | TCGCTCCTGGAAGATGGTGATGG  |
| Ger-Gpc1-F           | AGGAGACGCTGGCGGAGTTC     |
| Ger-Gpc1-R           | CCCAGGCAGTCCAGGTAGTCG    |
| Ger-Arpc1b-F         | GGCTCGACTCGCTGCATAAGAAC  |
| Ger-Arpc1b-R         | CTCTTCACGTCCCAGATGCTCATG |
| Ger-Dab2-F           | AACCAGGAAGAGGCAGAAGGA    |
| Ger-Dab2-R           | AAAGAGAGCTTGCGTCAACCA    |
| Ger-Cfl1-F           | TCTGGTGTGGCTGTCTCTGATGG  |
| Ger-Cfl1-R           | ACTTCTTCTGGCGTTGAGGACTTG |
